# Supplementary material for: Substantially enhanced rate capability of lithium storage in Na2Ti6O13 with self-doping and carbon-coating
Source: Royal Society of Chemistry journal article supplement (doi:10.1039/c8ra00468d), 2018-01-01
Supplement: c8ra00468d1.pdf [file c8ra00468d1.pdf]

## Electronic Supplementary Information

### Substantially Enhanced Rate Capability of Lithium Storage in $\text{Na}_2\text{Ti}_6\text{O}_{13}$ with Self-doping and Carbon-coating

Jin-Yun Liao,<sup>a</sup> Taylor W. Smith,<sup>a</sup> Raja R. Pandey,<sup>b</sup> Xiaoqing He,<sup>c</sup> Charles C. Chusuei<sup>b</sup> and Yangchuan Xing<sup>a\*</sup>

<sup>a</sup>Department of Chemical Engineering, University of Missouri, Columbia, Missouri 65211

<sup>b</sup> Chemistry Department, Middle Tennessee State University, Murfreesboro, TN 37132

<sup>c</sup> Electron Microscopy Core Facility, University of Missouri, Columbia, Missouri 65211

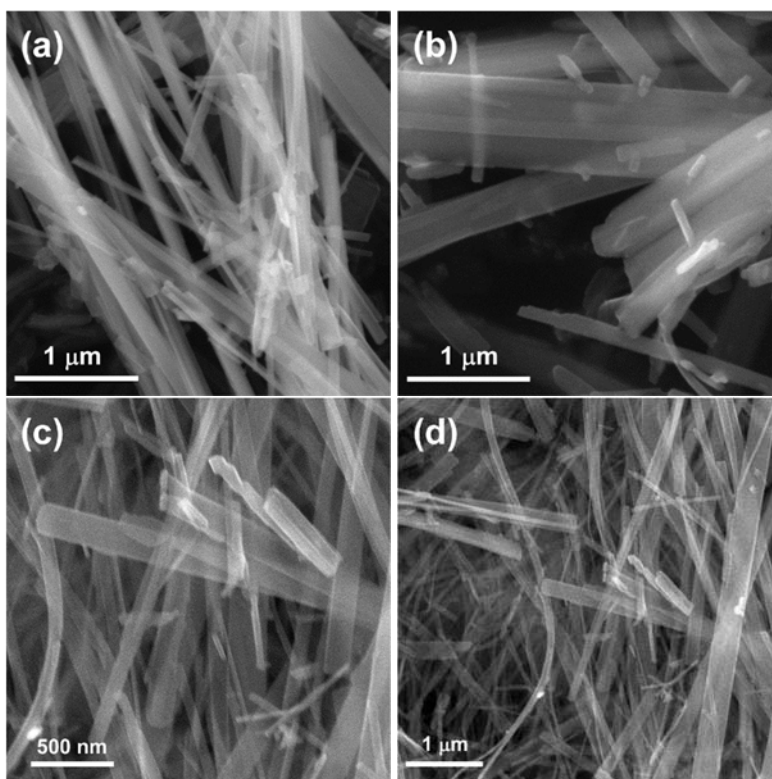

**Fig. S1** SEM images of prepared NTO-based nanowires. (a) Pristine NTO nanowires, (b) carbon coated NTO-C nanowires and (c, d)  $\text{Ti}^{3+}$  self-doped and carbon coated H-NTO-C nanowires.

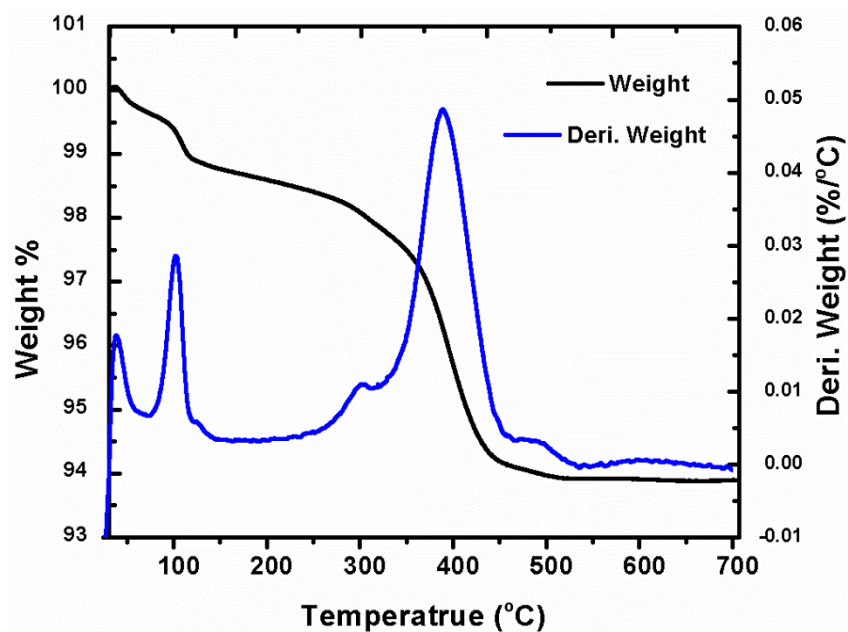

Fig. S2 TGA curve of carbon coated NTO-C nanowires.

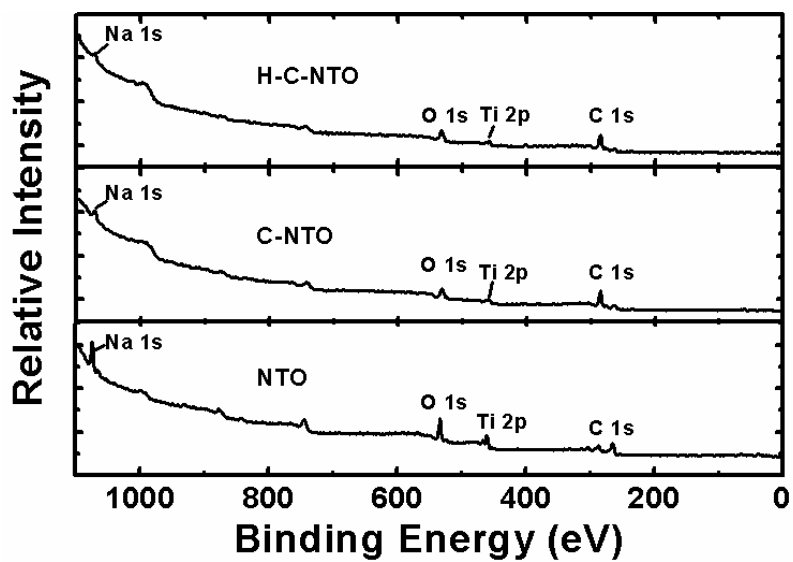

Fig. S3 Survey scan of NTO, C-NTO and H-C-NTO samples.

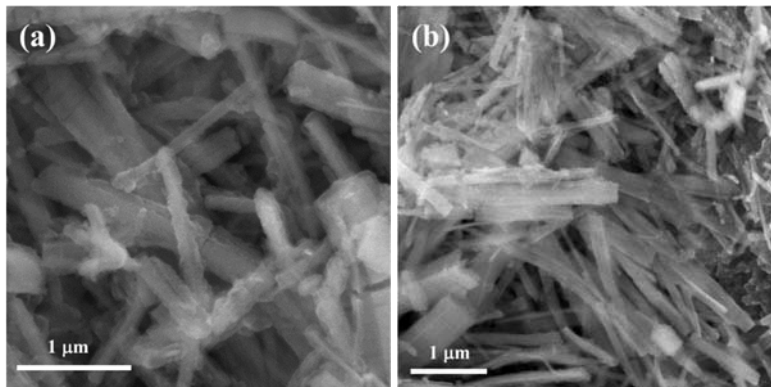

**Fig. S4** SEM images of (a) NTO and (b) NTO-C electrodes after 300 cycles at 1C rate in Li-ion batteries.

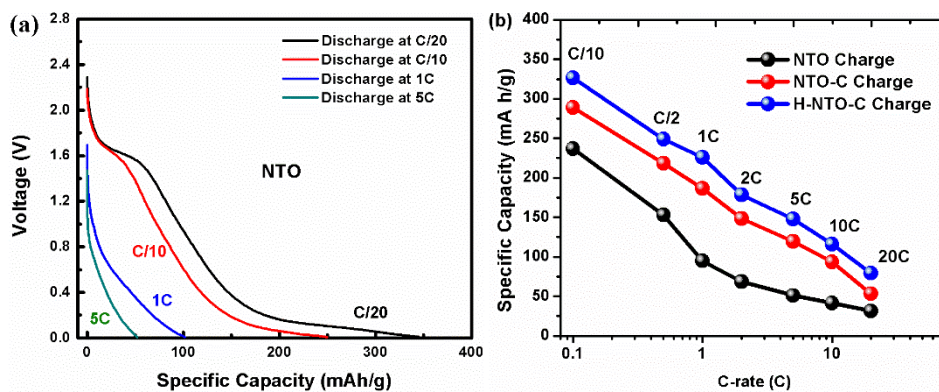

**Fig. S5** Galvanostatic profiles of (a) NTO electrode at various current rates. (b) Rate capability comparison of NTO, NTO-C and H-NTO-C electrodes.

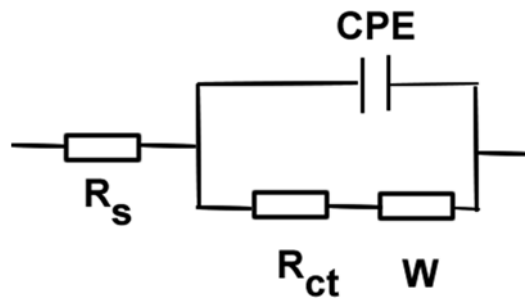

**Fig. S6** Selected equivalent circuit used to fit the EIS Nyquist plots. The  $R_s$  reflects electric conductivity of the electrolyte, separator, and electrodes, which corresponded to the first semicircle at high frequency;  $R_{ct}$  and  $Cdl$  were the charge transfer resistance and its relative double-layer capacitance, which corresponded to the second semicircle at medium frequency;  $W$  was the Warburg impedance related to the diffusion effect of Li, which was generally indicated by a sloping line at low frequency. The fitted  $R_s$  and  $R_{ct}$  are listed in Table S1.

**Table S1.**  $R_s$  and  $R_{ct}$  fitted by Z-view with selected equivalent circuit (Fig. S6)

| Sample  | $R_s$ (Ohm) | $R_{ct}$ (Ohm) |
|---------|-------------|----------------|
| NTO     | 7.2         | 343            |
| NTO-C   | 6.9         | 170            |
| H-NTO-C | 6.7         | 120            |
